# Supplementary material
Source: publisher figshare collection journal article supplement (https://acs.figshare.com/ndownloader/files/5832510)
Supplement: Supplementary file 1 [file 5832510]

**Figure S-1.** The Job Plots between host **1** and triamine **2-6** in methanol at 25 °C.

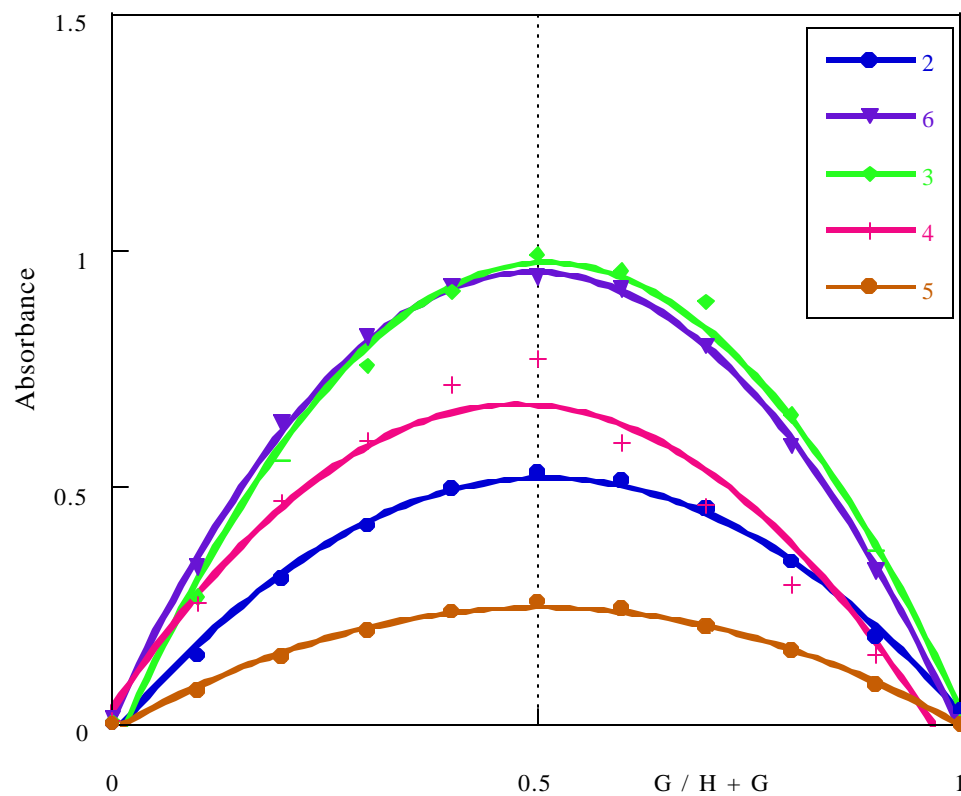

Concentrations;  $[1] + [2] = 1.7 \times 10^{-3} \text{ M}$ ,  $[1] + [3] = 1.4 \times 10^{-3} \text{ M}$ ,  $[1] + [4] = 5.1 \times 10^{-4} \text{ M}$ ,  $[1] + [5] = 2.6 \times 10^{-3} \text{ M}$ ,  $[1] + [6] = 1.3 \times 10^{-3} \text{ M}$ .
